# Supplementary material for: Surface wettability engineering of MoS2 quantum dot-decorated NiCo2O4 nanospheres for enhanced oxygen evolution reaction
Source: Royal Society of Chemistry journal article supplement (doi:10.1039/d5cc02615f), 2025-01-01
Supplement: d5cc02615f1.pdf [file d5cc02615f1.pdf]

## Supporting Information

### Surface wettability engineering of MoS<sub>2</sub> quantum dots-decorated NiCo<sub>2</sub>O<sub>4</sub> nanospheres for enhanced oxygen evolution reaction

*Xu Yue<sup>a,b</sup>, Hongyan Wu,<sup>a,c</sup> Yong Zhang<sup>c</sup>, Bin Xue<sup>d\*</sup> and Yuqiao Wang<sup>a,b,\*</sup>*

<sup>a</sup>Research Center for Nano Photoelectrochemistry and Devices, School of Chemistry and Chemical Engineering, Southeast University, Nanjing, Jiangsu 211189, China

<sup>b</sup>Yangtze River Delta Carbon Neutrality Strategy Development Institute, Southeast University, Nanjing 210096, China

<sup>c</sup>College of Textile Science and Engineering (International Silk College), Zhejiang Sci-Tech University, Hangzhou 310018, China

<sup>d</sup>Department of Chemistry, College of Food Science and Technology, Shanghai Ocean University, Shanghai 201306, China

E-mail: bxue@shou.edu.cn (B. Xue), yqwang@seu.edu.cn (Y. Wang)

#### 1. Experimental

##### 1.1 Materials

All chemical reagents were of analytical grade and used as received: Sodium molybdate dihydrate (Na<sub>2</sub>MoO<sub>4</sub>·2H<sub>2</sub>O), L-Cysteine (C<sub>3</sub>H<sub>7</sub>NO<sub>2</sub>S), urea (CH<sub>4</sub>N<sub>2</sub>O), cobalt(II) nitrate hexahydrate (Co(NO<sub>3</sub>)<sub>2</sub>·6H<sub>2</sub>O), nickel(II) nitrate hexahydrate (Ni(NO<sub>3</sub>)<sub>2</sub>·6H<sub>2</sub>O), anhydrous ethanol (C<sub>2</sub>H<sub>5</sub>OH), ethylene glycol ((CH<sub>2</sub>OH)<sub>2</sub>), platinum on carbon (Pt/C, 20 wt%), ruthenium(IV) oxide (RuO<sub>2</sub>), and Nafion® perfluorinated resin solution (5 wt%). All materials were procured from Sinopharm Chemical Reagent Co., Ltd. (China). Deionized water (18.2 MΩ·cm) was used throughout the experiments.

##### 1.2 Preparation of MoS<sub>2</sub> Quantum Dots

The MoS<sub>2</sub>-QDs were prepared through a hydrothermal route with the following optimized

procedure: Dissolve sodium molybdate dihydrate ( $\text{Na}_2\text{MoO}_4 \cdot 2\text{H}_2\text{O}$ , 0.24 g, 1.0 mmol) and L-cysteine ( $\text{C}_3\text{H}_7\text{NO}_2\text{S}$ , 0.21 g, 1.75 mmol) in 25 mL deionized water under magnetic stirring for 30 min, forming a homogeneous yellow precursor suspension. Transfer the mixture to a 50 mL Teflon-lined stainless steel autoclave and maintain at 200 °C for 10 h under autogenous pressure. Centrifuge the cooled reaction product at 12,000 rpm for 15 min to obtain  $\text{MoS}_2$ -QDs-1 colloidal solution. For controlled surface functionalization,  $\text{MoS}_2$ -QDs-(2-4) were synthesized by systematically increasing L-cysteine quantities to 0.24 g (2.0 mmol), 0.27 g (2.25 mmol), 0.30 g (2.5 mmol) and 0.33 g (2.75 mmol), respectively, while keeping other parameters constant. The numerical designation reflects the increasing Mo:S molar ratio from 1:1.75 (MS-QDs-1) to 1:2.75 (MS-QDs-5).

### 1.3 Preparation of MS@NCO Composite

The prepared procedure was conducted as follows: 25 mL of  $\text{MoS}_2$  quantum dot (QD) colloidal suspension was transferred into a 100 mL borosilicate beaker. Subsequently, 0.20 g cobalt(II) acetate tetrahydrate ( $\text{Co}(\text{CH}_3\text{COO})_2 \cdot 4\text{H}_2\text{O}$ ), 0.20 g nickel(II) acetate tetrahydrate ( $\text{Ni}(\text{CH}_3\text{COO})_2 \cdot 4\text{H}_2\text{O}$ ), and 0.45 g urea ( $\text{CH}_4\text{N}_2\text{O}$ ) were sequentially added to the suspension under continuous magnetic stirring (2000 rpm) until complete dissolution of metal salts was achieved. The homogeneous mixture was then transferred into a 50 mL polytetrafluoroethylene (PTFE)-lined stainless-steel autoclave and subjected to hydrothermal treatment at 120 °C for 4 h in a forced convection oven. The resulting precipitate was collected through centrifugation (8000 rpm, 10 min), repeatedly washed with deionized water and absolute ethanol (3 cycles each), then vacuum-dried at 60 °C for 12 h. For subsequent thermal processing, 0.5 g of the intermediate product was uniformly dispersed in a porcelain combustion boat and annealed in a tube furnace under ambient atmosphere. The thermal protocol involved ramping to 350 °C at 5 °C  $\text{min}^{-1}$  heating rate, maintaining isothermal conditions for 2 h, followed by natural cooling to room temperature to yield the final MS@NCO composite.

### 1.4 Electrocatalyst Preparation

The catalyst ink was formulated by homogenizing 2.0 mg active material with 0.5 mg acetylene black conductive additive and 50  $\mu\text{L}$  Nafion binder (5 wt%) in 2.0 mL mixed solvent (1:1 v/v ethanol/water) through 30-minute ultrasonication (40 kHz bath). A precisely controlled 20  $\mu\text{L}$  aliquot was drop-cast onto the GC substrate, yielding a loading of 0.42  $\text{mg cm}^{-2}$ , followed by ambient drying.

## 1.5 Characterization

The microstructural and compositional analysis was performed using advanced characterization techniques: morphological evaluation via field emission scanning electron microscopy (FE-SEM, FEI Inspect F50, 20 kV) with energy-dispersive X-ray spectroscopy (EDS) for elemental mapping, nanostructural investigation through high-resolution transmission electron microscopy (HR-TEM, Thermo Scientific Talos F200X, 200 kV) equipped with selected-area electron diffraction (SAED), crystallographic analysis by X-ray diffraction (XRD, Shimadzu XRD-6100 LabX, Cu K $\alpha$   $\lambda$ =1.5406 Å,  $2\theta$ =10°-80°), surface chemistry profiling using X-ray photoelectron spectroscopy (XPS, Thermo Scientific K-Alpha+, Al K $\alpha$  1486.6 eV) with charge compensation, molecular bonding analysis via Fourier-transform infrared spectroscopy (FT-IR, Thermo Scientific Nicolet iS50, ATR mode, 400-4000 cm<sup>-1</sup>), and surface wettability assessment through dynamic contact angle measurements (LAUDA Scientific LSA100, 5  $\mu$ L H<sub>2</sub>O sessile drop).

## 1.6 Electrochemical Evaluation

All electrochemical measurements were conducted using a CHI 760E electrochemical workstation in 1.0 M KOH electrolyte (pH 13.6). A standard three-electrode configuration was employed: Catalyst-modified glassy carbon (GC, 3 mm diameter) as a working electrode, graphite rod as a counter electrode, and saturated calomel electrode (SCE) as a reference electrode.

The potential conversion formula relative to the standard hydrogen electrode (RHE) is as follows:

$$E_{RHE} = E_{SCE} + 0.059 \times pH + 0.241$$

where  $E_{RHE}$  and  $E_{SCE}$  are potential vs. standard hydrogen electrode and potential vs. saturated calomel electrode.

The OER activity was evaluated through linear sweep voltammetry (LSV) at 2 mV s<sup>-1</sup> scan rate with 90% iR-compensation based on solution resistance derived from electrochemical impedance spectroscopy (EIS) measurements.

Kinetic analysis was conducted through EIS in the 0.01-100 kHz frequency range combined with variable-scan-rate cyclic voltammetry (20-140 mV s<sup>-1</sup>) for double-layer capacitance ( $C_{dl}$ )

determination.

The electrochemical active surface area (*ECSA*) is calculated as following equation<sup>1</sup>:

$$ECSA = \frac{C_{dl}}{C_s}$$

where  $C_s$  is general specific capacitance of smooth electrode (0.04 mF cm<sup>-2</sup>).

Catalyst stability was assessed via chronopotentiometric testing under constant current density (400 mA cm<sup>-2</sup>) with continuous operational monitoring spanning 24 hours (25°C).

## 2. Computational Fluid Dynamics Modeling

Numerical simulations were implemented in COMSOL Multiphysics® v6.0 (Burlington, MA) to investigate oxygen bubble detachment dynamics at catalyst-electrolyte interfaces. The Multiphysics framework incorporated five essential modules:

### 2.1 Multiphase Geometric Construction

The 2D axisymmetric multiphase model comprised: (i) a catalyst solid phase with experimentally determined contact angles ( $\theta = 92^\circ$ ), (ii) a vertically aligned liquid electrolyte column ( $H = 20$  mm) governed by gravitational effects, and (iii) an oxygen gas phase nucleus ( $r_o = 1$  mm), with interfacial dynamics resolved through surface-adaptive coordinate transformation techniques.

### 2.2 Material Property Assignment

Physicochemical parameters were defined based on experimental conditions as followings.

| Parameters            | Value      | Source                              |
|-----------------------|------------|-------------------------------------|
| Electrolyte viscosity | 1.0 mPa·s  | 1.0 mol L <sup>-1</sup> KOH at 25°C |
| Oxygen viscosity      | 20.3 μPa·s | NIST REFPROP database               |
| Surface tension       | 72 mN/m    | Water-air interface                 |

| Parameters    | Value               | Source                    |
|---------------|---------------------|---------------------------|
| Contact angle | $\theta = 92^\circ$ | Experimental measurements |

### 2.3 Governing Equations System

The phase-field method solved the coupled Cahn-Hilliard and Navier-Stokes equations:

The Cahn–Hilliard equation is written as<sup>2</sup>:

$$\frac{\partial c}{\partial t} = D \nabla^2 (c^3 - c - \gamma \nabla^2 c)$$

where  $D$  is a diffusion coefficient with units of Length<sup>2</sup>/Time and  $\sqrt{\gamma}$  gives the length of the transition regions between the domains. Additionally, the quantity  $\mu = c^3 - c - \gamma \nabla^2 c$  is identified as a chemical potential.

The incompressibility Navier-Stokes equation is written as<sup>3</sup>:

$$\frac{Du}{Dt} = \frac{\partial u}{\partial t} + (u \cdot \nabla)u = \nu \nabla^2 u - \frac{1}{\rho} \nabla p + \frac{1}{\rho} f$$

where  $\nu = \mu/\rho$  (kinematic viscosity),  $\mathbf{u}$  is the flow velocity,  $\rho$  is the (mass) density,  $p$  is the pressure, and  $\mathbf{f}$  is the external source.

The phase field model is used to track the evolution of gas-liquid-solid interface<sup>4</sup>:

$$\frac{\partial \varphi}{\partial t} + u \cdot \nabla \varphi = \nabla \cdot \frac{\gamma \lambda}{\varepsilon_{pf}^2} \nabla \psi$$

$$\psi = -\nabla \cdot \varepsilon_{pf}^2 \nabla \varphi + (\varphi^2 - 1)\varphi + \frac{\varepsilon_{pf}^2}{\lambda} \frac{\partial f}{\partial \varphi}$$

$$\text{where } \varphi = \text{phase field}, \lambda = \frac{3\varepsilon_{pf}^2 \sigma}{\sqrt{8}}, \text{ and } \gamma = \chi \varepsilon_{pf}^2.$$

### 2.4 Boundary Condition Specification

The multiphysics boundary configuration encompassed: (i) no-slip velocity boundary with dynamic contact angle implementation ( $\theta = 92^\circ$ ) at catalyst interfaces, (ii) atmospheric pressure outlet ( $p = 101.325$  kPa) at upper domain boundaries, (iii) axisymmetric flux continuity along central rotation axis, and (iv) quiescent initialization [ $u(r,z,t_0) = 0$ ;  $p(r,z,t_0) = \rho gh(r)$ ] reflecting hydrostatic equilibrium.

## 2.5 Adaptive Mesh Refinement

The adaptive mesh refinement strategy employed a hybrid discretization scheme comprising: (i) 5-layer inflation boundary mesh (growth rate 1.2 %) adjacent to catalytic surfaces, (ii) interface-conforming triangular elements ( $h_{min} = 0.02$   $\mu\text{m}$ ) resolving gas-liquid menisci, and (iii) background quadrilateral elements ( $h_{max} = 2$   $\mu\text{m}$ ) in bulk domains, with grid convergence index (GCI)  $< 3\%$  achieved through successive h-refinement cycles.

## 2.6 Density functional theory calculation

Spin-polarized density functional theory calculations were conducted using the Vienna Ab initio Simulation Package (VASP) employing the Perdew-Burke-Ernzerhof (PBE) generalized gradient approximation (GGA) for exchange-correlation interactions. Structural optimizations proceeded via conjugate gradient minimization until reaching convergence thresholds of  $10^{-4}$  eV for total energy and  $0.05$  eV $\cdot\text{\AA}^{-1}$  for residual atomic forces. The heterostructure model incorporated a periodic slab geometry with a  $15$   $\text{\AA}$  vacuum spacer along the z-axis to avoid periodic interactions. Initial crystallographic configurations for  $\text{NiCo}_2\text{O}_4$  and  $\text{MoS}_2$  were obtained from the Materials Project Database (materialsproject.org). The computational model was conducted with a  $\text{MoS}_2$  quantum dots anchored on the thermodynamically stable  $\text{NiCo}_2\text{O}_4(200)$  surface.

## Supplementary Figures

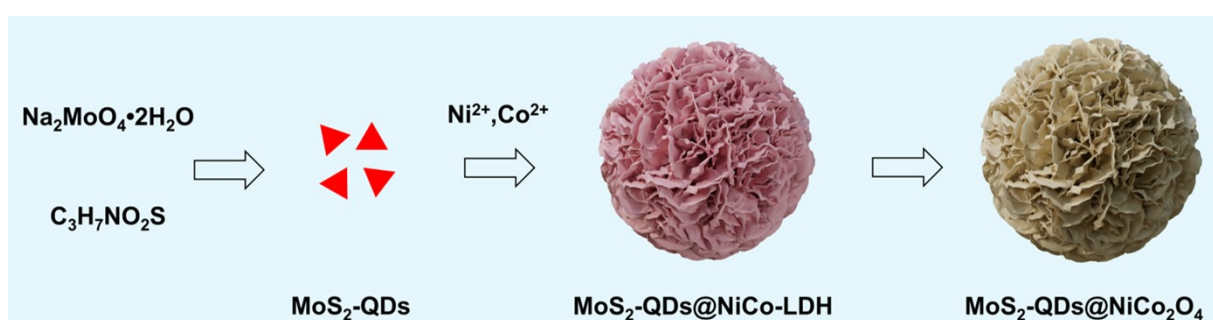

Fig. S1 Schematic illustration of the hydrothermal synthesis process for MS@NCO.

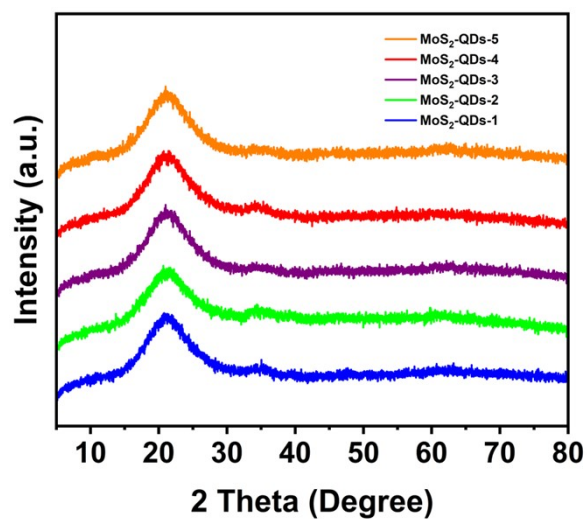

Fig. S2 XRD pattern of the synthesized  $\text{MoS}_2\text{-QDs}$ .

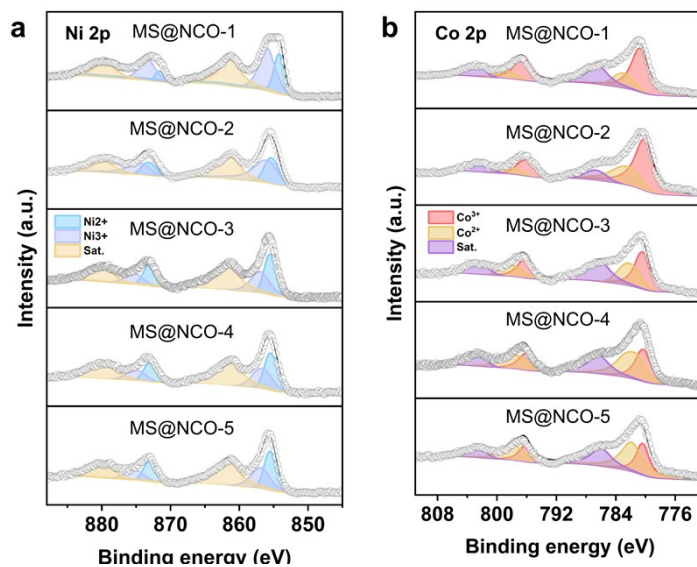

**Fig. S3** XPS spectra of (a) Ni 2p and (b) Co 2p in MS@NCO.

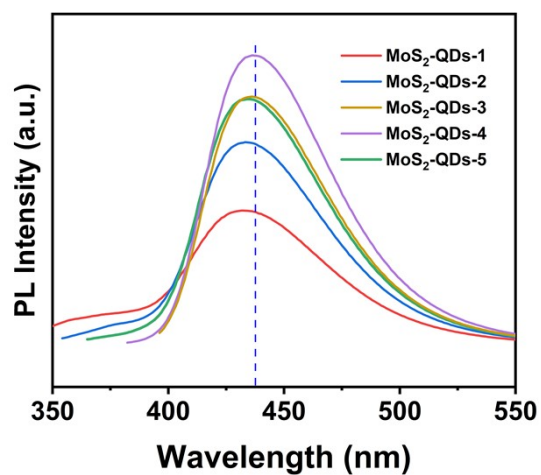

**Fig. S4** Fluorescence excitation spectra of MoS<sub>2</sub>-QDs series.

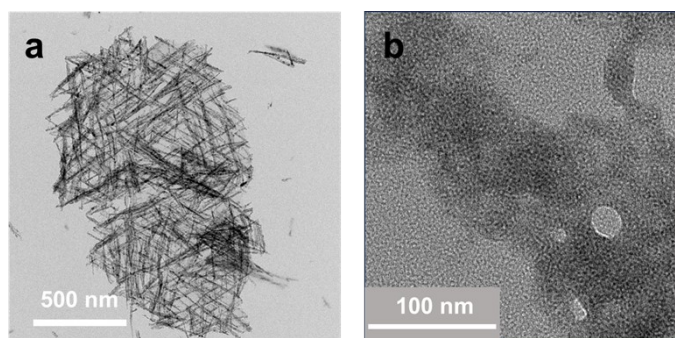

**Fig. S5** TEM images of (a) pristine NiCo<sub>2</sub>O<sub>4</sub> and (b) MoS<sub>2</sub>-QDs.



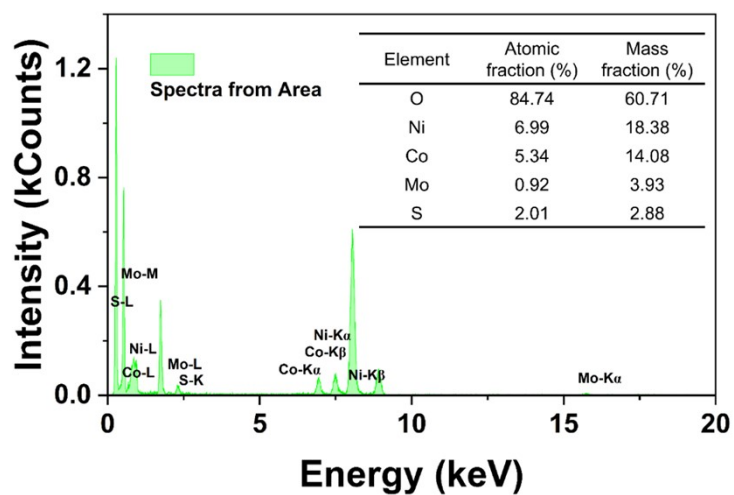

**Fig. S6** Energy dispersive X-ray spectra with element contents.

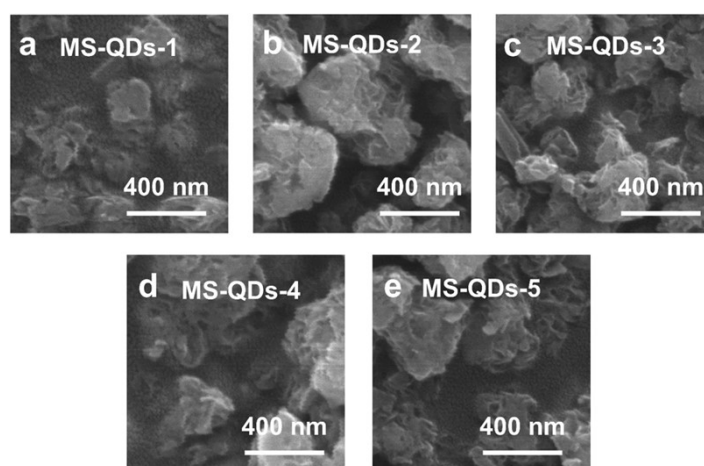

**Fig. S7** SEM images of (a) MoS<sub>2</sub>-QDs-1, (b) MoS<sub>2</sub>-QDs-2, (c) MoS<sub>2</sub>-QDs-3, (d) MoS<sub>2</sub>-QDs-4, (e) MoS<sub>2</sub>-QDs-5.

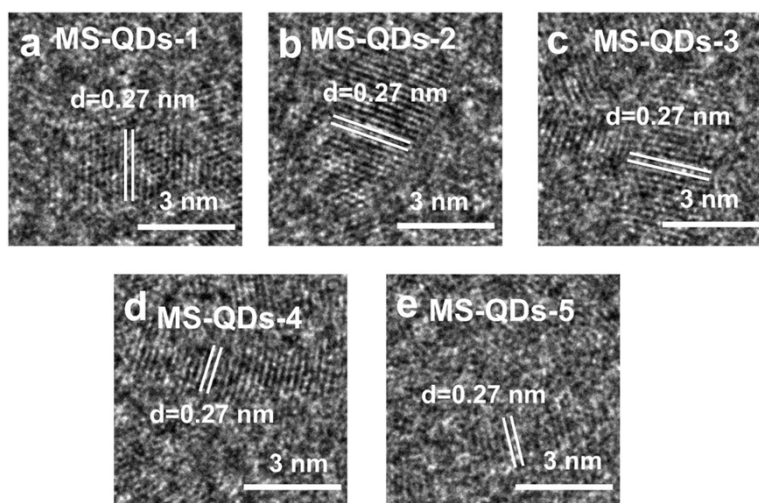

**Fig. S8** HREM images of (a) MoS<sub>2</sub>-QDs-1, (b) MoS<sub>2</sub>-QDs-2, (c) MoS<sub>2</sub>-QDs-3, (d) MoS<sub>2</sub>-QDs-4, (e) MoS<sub>2</sub>-QDs-5.

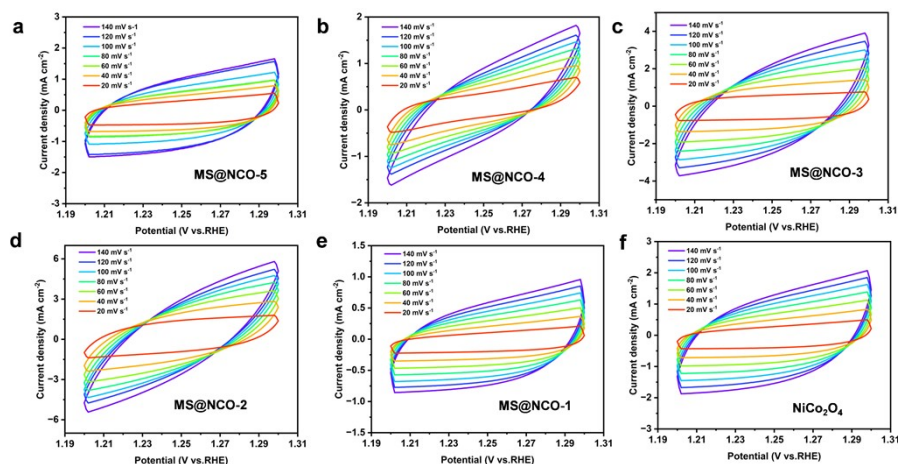

**Fig. S9** CV curves of MS@NCO and NiCo<sub>2</sub>O<sub>4</sub> at scan rates of 20–140 mV s<sup>-1</sup>.

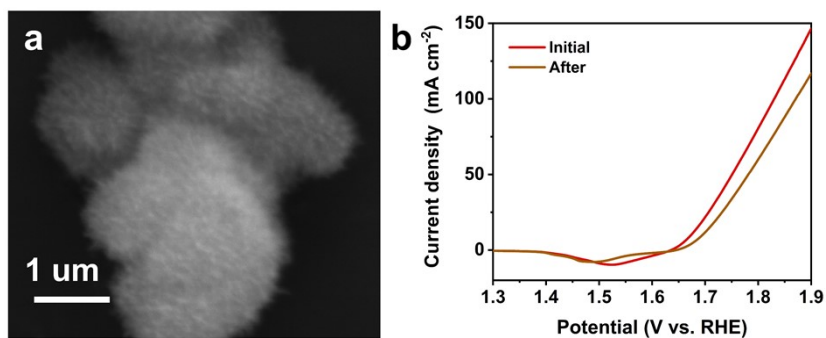

**Fig. S10** (a) SEM images of MS@NCO-4 after continuous OER for 24 h, (b) LSV curves before and after stability test.

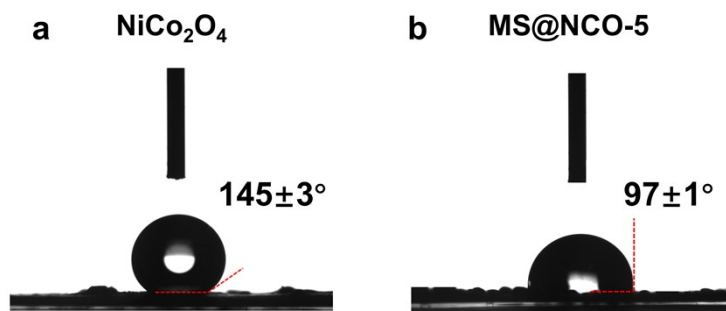

**Fig. S11** Contact angle images of (a) NiCo<sub>2</sub>O<sub>4</sub> and (b) MS@NCO-5.

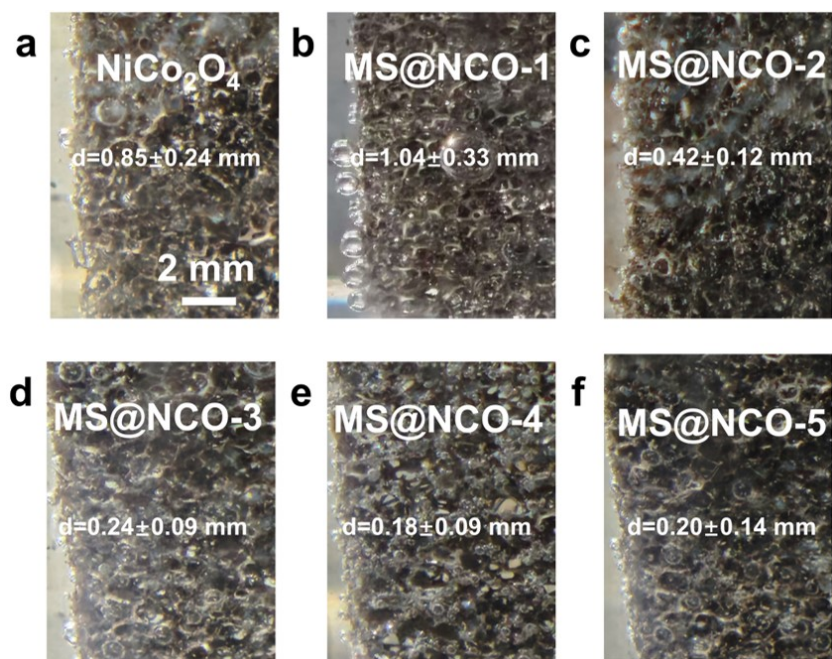

**Fig.S12** Bubble evolution on the electrode surface loaded with MS@NCO and  $\text{NiCo}_2\text{O}_4$  observed by optical microscope: (a)  $\text{NiCo}_2\text{O}_4$ ; (b) MS@NCO-1; (c) MS@NCO-2; (d) MS@NCO-3; (e) MS@NCO-4; (f) MS@NCO-5

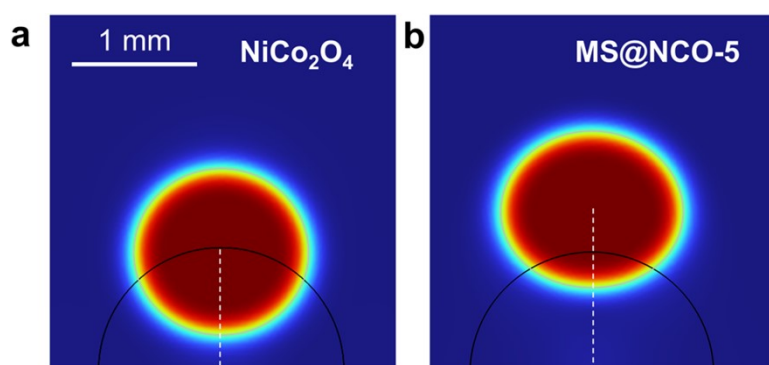

**Fig. S13** Simulated oxygen bubble detachment dynamics on (a) MS@NCO and (b) MS@NCO-5 surface.

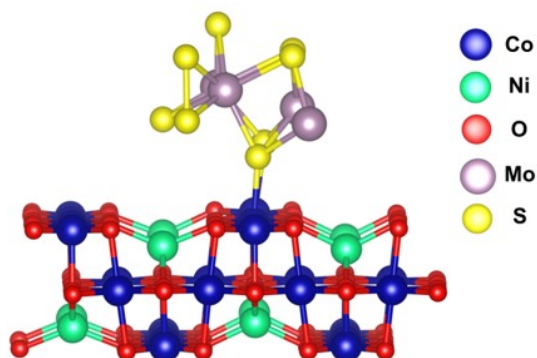

**Fig. S14** Calculation model of MS@NCO.

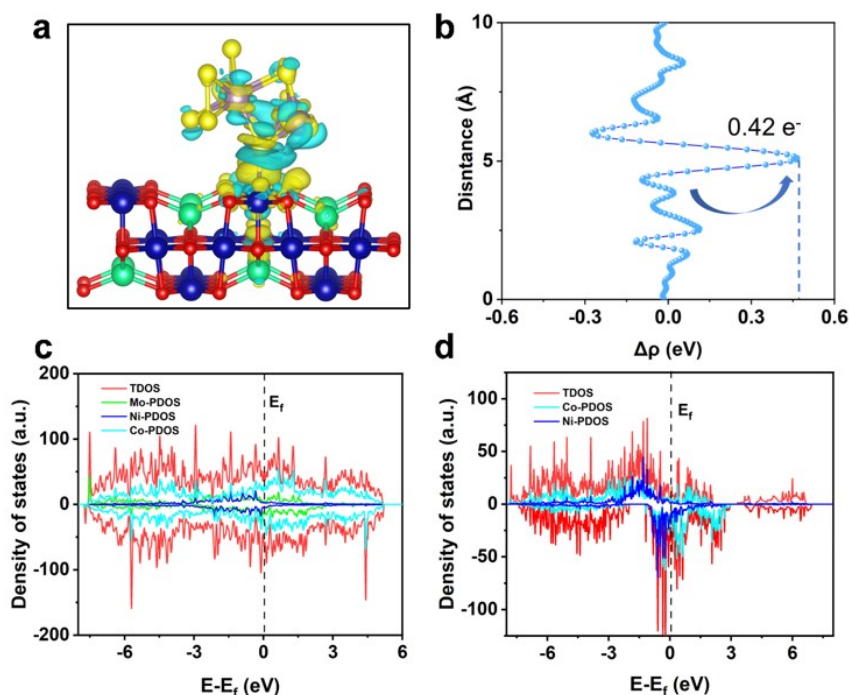

**Fig. S15** (a) Differential charge density diagram. (b) Charge displacement curve of MS@NCO interface. Density of states of (c) MS@NCO and (d) NiCo<sub>2</sub>O<sub>4</sub>.

## Supplementary Tables

**Table S1.** FTIR peak intensities of functional groups (–NH<sub>2</sub>, –COOH) in MoS<sub>2</sub>-QDs with varying Mo/S ratios.

| Mo/S Ratio | –NH <sub>2</sub> (a.u.) | –COOH (a.u.) |
|------------|-------------------------|--------------|
| 1:1.75     | 0.32                    | 0.28         |
| 1:2        | 0.41                    | 0.35         |
| 1:2.25     | 0.53                    | 0.47         |
| 1:2.5      | 0.69                    | 0.62         |
| 1:2.75     | 0.65                    | 0.55         |

**Table S2.** OER performance comparison, Tafel slope, and finite element simulation results of

MS@NCO samples.

| Parameter&<br>Sample                   | NiCo <sub>2</sub> O <sub>4</sub> | MS@NCO-<br>1 | MS@NCO-<br>2 | MS@NCO-<br>3 | MS@NCO-<br>4 | MS@NCO-<br>5 |
|----------------------------------------|----------------------------------|--------------|--------------|--------------|--------------|--------------|
| $\eta@10\text{ mA cm}^{-2}$ (mV)       | 340                              | 325          | 298          | 285          | 272          | 278          |
| Tafel Slope<br>(mV dec <sup>-1</sup> ) | 122.9                            | 100.4        | 96.4         | 84.0         | 76.3         | 79.5         |
| R <sub>s</sub> ( $\Omega$ )            | 3.4                              | 3.2          | 3.5          | 3.8          | 3.1          | 3.6          |
| R <sub>ct</sub> ( $\Omega$ )           | 57.1                             | 49.2         | 32.8         | 27.5         | 8.3          | 15.2         |
| C <sub>dl</sub> (mF cm <sup>-2</sup> ) | 6.3±0.5                          | 4.9±0.3      | 10.4±0.8     | 19.8±1.7     | 21.7±1.5     | 20.5±1.2     |
| ECSA (cm <sup>2</sup> )                | 157±12                           | 122±7        | 260±20       | 495±42       | 542±37       | 512±30       |

**Table S3.** Surface wettability and finite element simulation results of MS@NCO samples.

| Parameter&<br>Sample        | NiCo <sub>2</sub> O <sub>4</sub> | MS@NCO-<br>1 | MS@NCO-<br>2 | MS@NCO-<br>3 | MS@NCO-<br>4 | MS@NCO-<br>5 |
|-----------------------------|----------------------------------|--------------|--------------|--------------|--------------|--------------|
| Contact Angle (°)           | 145                              | 155          | 135          | 110          | 92           | 97           |
| Detachment Distance<br>(mm) | 0.85                             | 0.8          | 1.0          | 1.1          | 1.5          | 1.3          |
| Detachment Time (ms)        | 7.5                              | 8.9          | 5.9          | 4.3          | 3.5          | 3.8          |

## References

1. C. Wei, S. Sun, D. Mandler, X. Wang, S. Z. Qiao and Z. J. Xu, *Chem. Soc. Rev.*, 2019, **48**, 2518-2534.
2. S. Zhu, Z. Xu, F. Chen, H. Tao, X. Tang and Y. Wang, *J. Phys. Chem. C*, 2023, **127**, 21363-21373.

3. S. Zhu, H. Tao, Y. Liu, X. Ma, K. Wang and Y. Wang, *J. Phys. Chem. B*, 2022, **126**, 10913-10921.
4. S. He, K. Wang, B. Li, H. Du, Z. Du, T. Wang, S. Li, W. Ai and W. Huang, *Adv. Mater.*, 2023, **35**, 2307017.
